# Supplementary material for: Preparation of Poly(vinyl Alcohol) Microparticles for Freeze Protection of Sensitive Fruit Crops
Source: MDPI journal article supplement (doi:10.3390/polym14122452), 2022-06-16
Supplement: s1 [file s1]

## Supplementary information

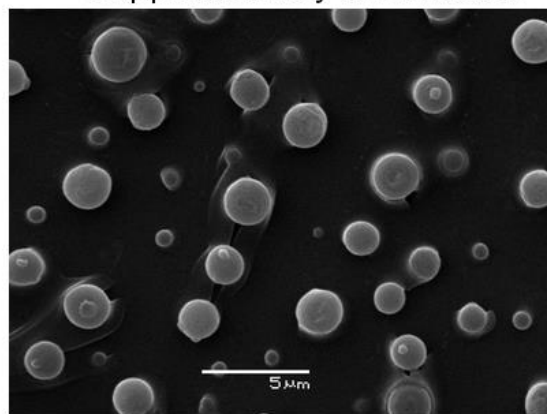

Figure S1-A. SEM image of L-PVA microparticles without neutralization

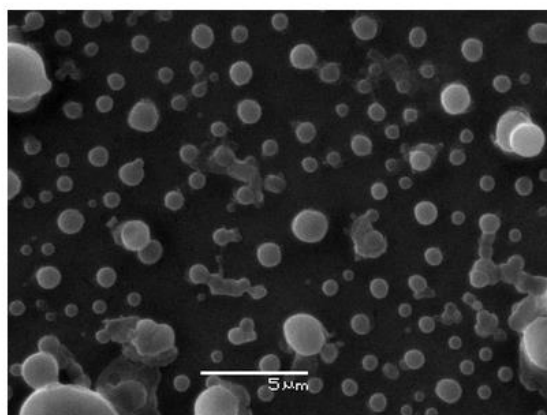

Figure S1-B. SEM image of m-PVA microparticles without neutralization

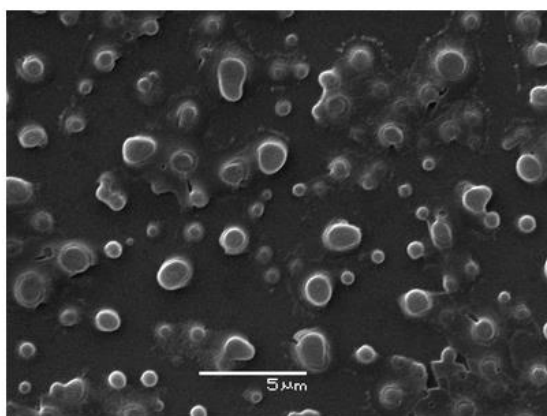

Figure S1-C. SEM image of h-PVA microparticles without neutralization

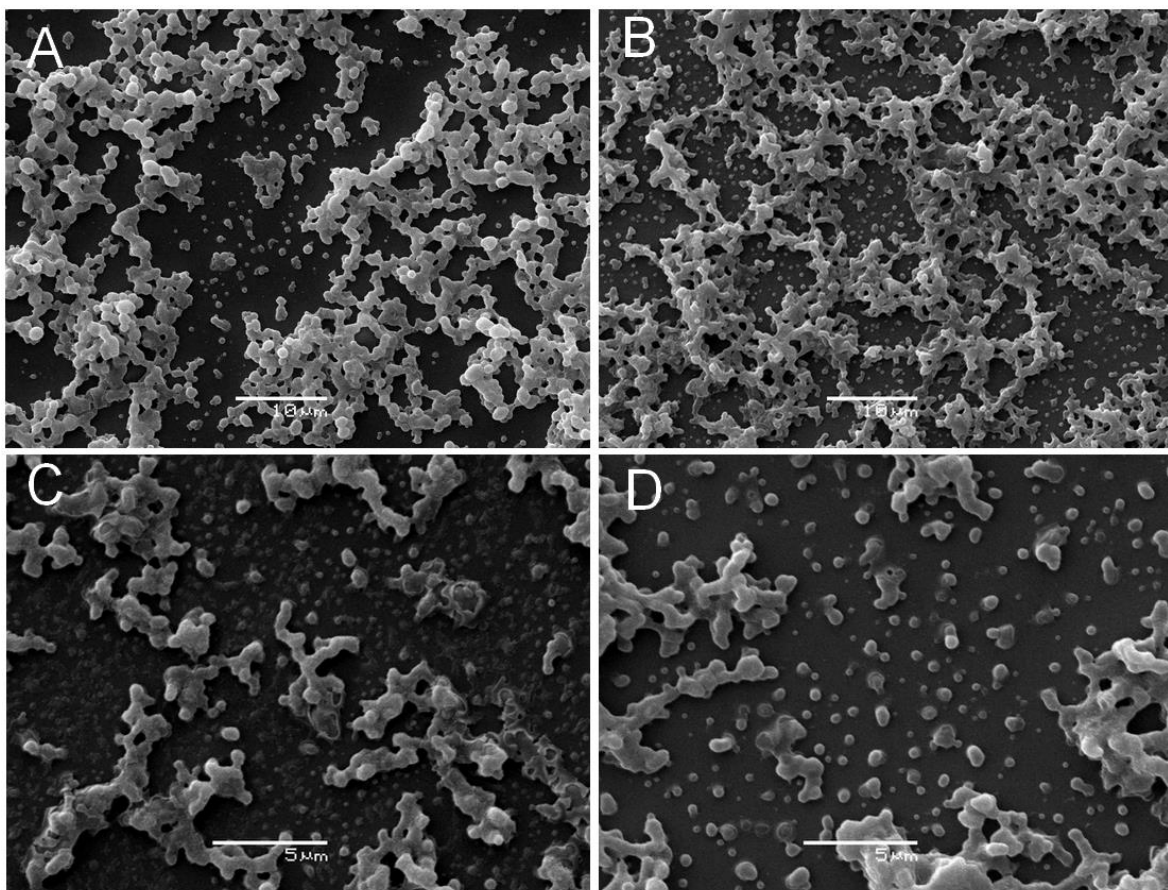

Figure S2. SEM images of h-PVA microparticles neutralized in different time storage. (A) and (C) 7 days of storage, (B) and (D) 180 days of storage.
